# Supplementary material for: Quinacrine upregulates p21/p27 independent of p53 through autophagy-mediated downregulation of p62-Skp2 axis in ovarian cancer
Source: PubMed Central journal article supplement (PMC5802832; doi:10.1038/s41598-018-20531-w), 2018-02-06
Supplement: 41598_2018_20531_MOESM1_ESM.pdf [file 41598_2018_20531_MOESM1_ESM.pdf]

**Title: Quinacrine upregulates p21/p27 independent of p53 through autophagy-mediated downregulation of p62-Skp2 axis in ovarian cancer**

**Authors:** Deok-Beom Jung<sup>1</sup>, Ashwani Khurana<sup>1</sup>, Debarshi Roy<sup>1</sup>, Eleftheria Kalogera<sup>2</sup>, Jamie Bakkum-Gamez<sup>2</sup>, Jeremy Chien<sup>3</sup> and Viji Shridhar<sup>1,#</sup>

**Affiliations:**

<sup>1</sup> *Department of Experimental Pathology, Mayo Clinic, Rochester, MN, USA.*

<sup>2</sup> *Division of Gynecologic Surgery, Department of Obstetrics and Gynecology, Mayo Clinic, Rochester, MN, USA*

<sup>3</sup> *Division of Molecular Medicine, University of New Mexico School of Medicine, Albuquerque, NM, USA*

**Fig.S1**

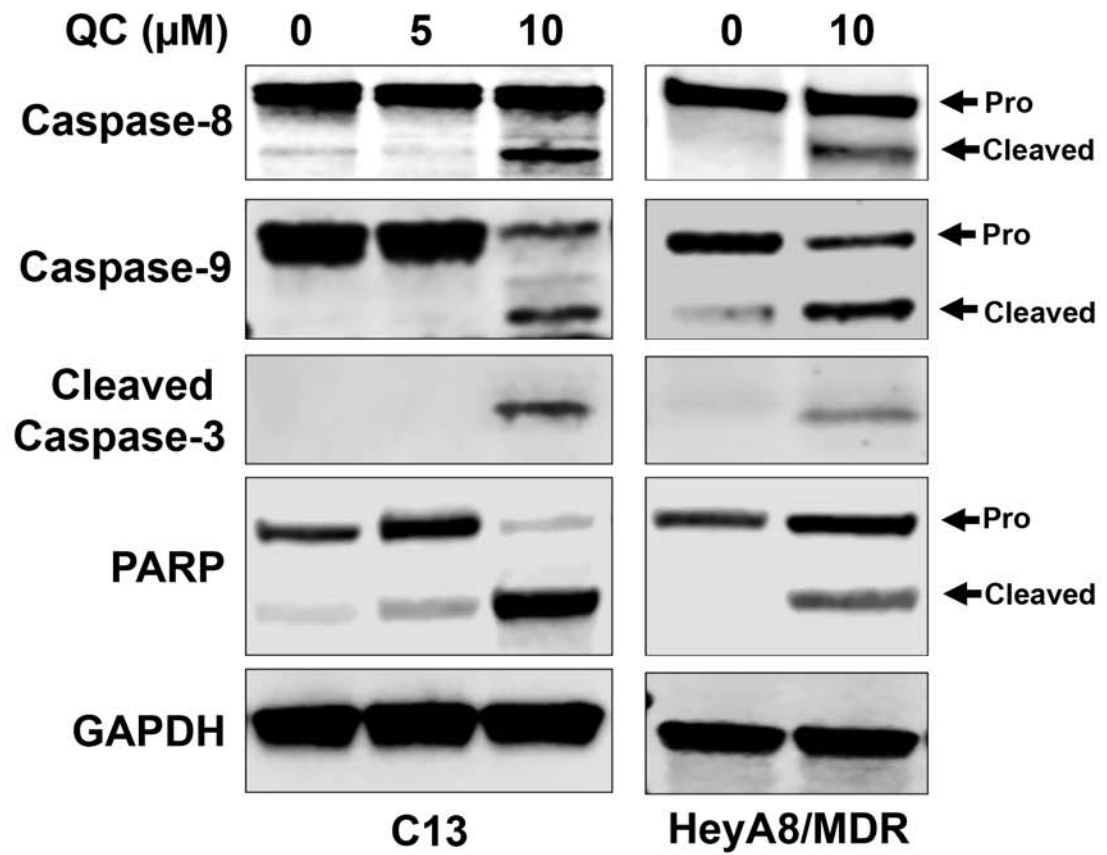

Figure S1: C13 Cells were treated with 5.0 and 10.0 $\mu\text{M}$  QC and HeyA8 MDR with 10.0 $\mu\text{M}$  QC for 24 hrs. Western blot analysis was performed with anti-cleaved PARP, anti-cleaved caspase 3 and anti caspases 8 and 9 and anti GAPDH antibodies.
